# Supplementary material
Source: PubMed Central journal article supplement (PMC6393193)
Supplement: NIHMS1517938-supplement-Major_Resource_Table.pdf [file NIHMS1517938-supplement-Major_Resource_Table.pdf]

Yakala et al. ATVB/2018/311903D: Major Resources Tables

Animals (*in vivo* studies)

| Species                    | Vendor or Source | Background Strain | Sex  |
|----------------------------|------------------|-------------------|------|
| <i>ApoE</i> <sup>-/-</sup> | Jax              | C57BL/6J          | Male |
| <i>Ldlr</i> <sup>-/-</sup> | Jax              | C57BL/6J          | Male |
|                            |                  |                   |      |

Animal breeding

|                 | Species                       | Vendor or Source | Background Strain | Other Information |
|-----------------|-------------------------------|------------------|-------------------|-------------------|
| Parent - Male   | <i>Ldlr</i> <sup>tm1Her</sup> | Jax              | C57BL/6J          |                   |
| Parent - Female | <i>Ldlr</i> <sup>tm1Her</sup> | Jax              | C57BL/6J          |                   |

Antibodies

| Target antigen                   | Vendor or Source         | Catalog #                  | Working concentration | Lot # (preferred but not required) |
|----------------------------------|--------------------------|----------------------------|-----------------------|------------------------------------|
|                                  |                          |                            |                       |                                    |
| Anti - SMA - Smooth Muscle Actin | DAKO                     | M 0851 clone 1A4           | 0.35 µg/ml            | -                                  |
| Isotype Mouse IgG                | Santa Cruz Biotechnology | sc-2025                    | 0.35 µg/ml            | -                                  |
| Anti-Mac2                        | CEDARLANE                | CL8942AP                   | 2.5 µg/ml             | -                                  |
| Isotype Rat IgG                  | Santa Cruz Biotechnology | sc-2026                    | 2.5 µg/ml             | -                                  |
| Anti-CD31 (PECAM-1)              | Santa Cruz Biotechnology | sc-1506                    | 4.0 µg/ml             | -                                  |
| Isotype Goat IgG                 | Santa Cruz Biotechnology | sc-2028                    | 4.0 µg/ml             | -                                  |
| Anti-TNF-alpha                   | Abcam                    | ab6671                     | 5.0 µg/ml             | -                                  |
| Isotype Rabbit IgG               | Santa Cruz Biotechnology | sc-2026                    | 5.0 µg/ml             | -                                  |
| Anti- CD54 (ICAM-1)              | e Bioscience             | 14-0542-85 clone eBioKIT-1 | 5.0 µg/ml             | -                                  |
| Isotype Rat IgG                  | Santa Cruz Biotechnology | sc-2026                    | 5.0 µg/ml             | -                                  |
| Rat Anti mouse CD107b (MAC 3)    | BD Pharmingen            | 550292                     | 0.15 µg/ml            | -                                  |
| Isotype Rat IgG1                 | BD Pharmingen            | 559072                     | 0.15 µg/ml            | -                                  |
| Goat anti Rat- HRP               | Abcam                    | ab97057                    | 5.0 µg/ml             | -                                  |
| ASM-1(Anti-smooth Muscle Actin)  | Progen                   | 61001                      | 0.12 µg/ml l          | -                                  |

|                          |                          |           |           |   |
|--------------------------|--------------------------|-----------|-----------|---|
| Isotype Rat IgG2a        | Santa Cruz Biotechnology | SC-3883   | 0.12ug/ml | - |
| Rabbit anti mouse-Biotin | Dako (Agilent)           | E041301-2 | 5.0 µg/ml | - |

### Cultured Cells

| <b>Name</b>                               | <b>Vendor or Source</b>                                                                                               | <b>Sex (F, M, or unknown)</b> |
|-------------------------------------------|-----------------------------------------------------------------------------------------------------------------------|-------------------------------|
| THP-1 monocytes                           | American Type Culture Collection (ATCC)<br>10801 University Boulevard<br>Manassas, VA 20110 USA<br>(ATCC #TIB-202)    | One-year infant / male        |
| Primary coronary artery endothelial cells | American Type Culture Collection (ATCC)<br>10801 University Boulevard<br>Manassas, VA 20110 USA<br>(ATCC PCS-100-020) | Male                          |
|                                           |                                                                                                                       |                               |
